# Supplementary material for: Evaluation of curcumin-mediated photodynamic therapy on the reverse of multidrug resistance in tumor cells
Source: Royal Society of Chemistry journal article supplement (doi:10.1039/c9ra09996d), 2020-01-01
Supplement: c9ra09996d1.pdf [file c9ra09996d1.pdf]

### Supplementary Material

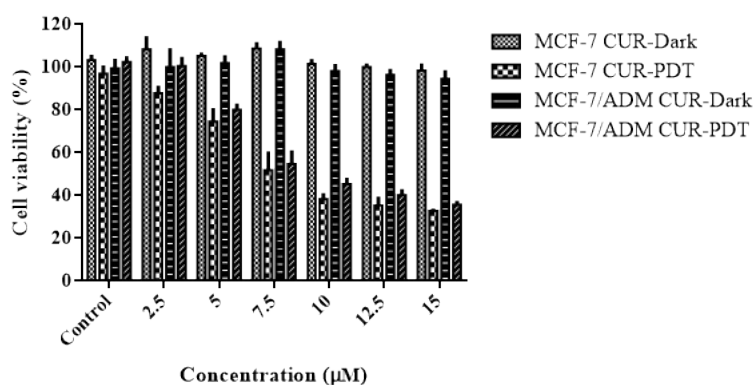

S1 Cytotoxicity of MCF-7 and MCF-7/ADM cells treated with CUR-PDT.

S2 Viabilities of MCF-7 and MCF/ADM cells treated CUR with or without PDT

| Group   | MCF-7<br>CUR-Dark | MCF-7<br>CUR-PDT | MCF-7/ADM<br>CUR-Dark | MCF-7/ADM<br>CUR-PDT |
|---------|-------------------|------------------|-----------------------|----------------------|
| Control | 103.49±1.58       | 96.95±3.14       | 99.59±3.70            | 102.46±1.89          |
| 2.5     | 108.33±5.28       | 87.88±2.63       | 100.00±8.06           | 100.57±3.40          |
| 5       | 105.33±0.69       | 74.69±5.32       | 101.94±2.78           | 80.10±2.06           |
| 7.5     | 108.77±2.21       | 51.83±7.97       | 108.43±3.02           | 54.80±5.42           |
| 10      | 101.60±1.43       | 38.32±1.91       | 98.29±2.51            | 45.33±2.33           |
| 12.5    | 100.08±0.85       | 35.46±3.27       | 96.51±1.87            | 40.21±1.92           |
| 15      | 98.56±2.41        | 32.93±0.26       | 94.68±3.09            | 35.75±0.86           |

S3 DCF fluorescent intensity in MCF-7 and MCF-7/ADM cells

| Time (h) | MCF-7     | MCF-7/ADM |
|----------|-----------|-----------|
| 2        | 2.90±0.57 | 1.43±0.55 |
| 4        | 3.15±0.35 | 1.50±0.53 |
| 6        | 4.55±0.21 | 3.13±0.59 |
| 8        | 4.35±0.64 | 2.80±0.53 |
| 10       | 3.80±0.85 | 2.77±0.40 |
| 12       | 3.85±0.78 | 2.87±0.35 |

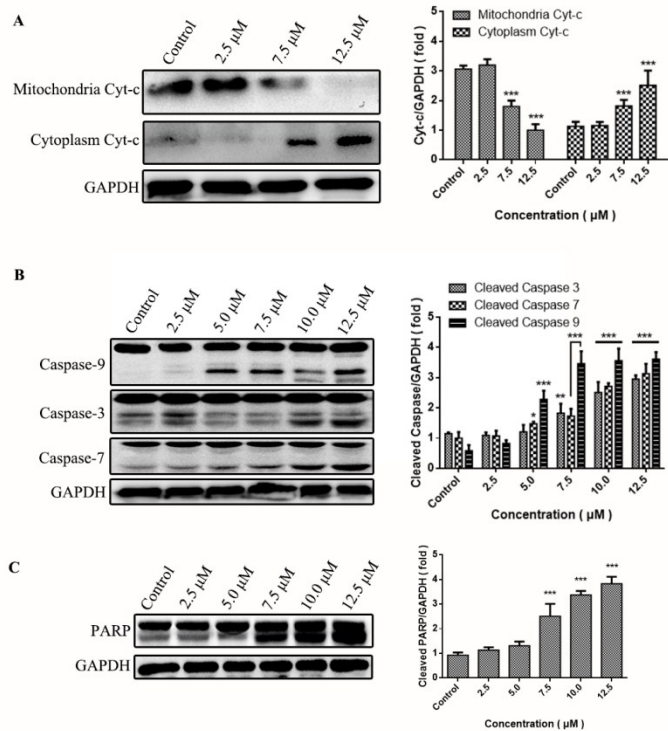

S4 Expression of cyt-c (A), caspase3/7/9 (B) and PARP (C) in MCF-7 cells by western blot. \* $P < 0.05$ , \*\* $P < 0.01$ , \*\*\* $P < 0.001$  vs. control.
